# Supplementary material for: Posttranslational Modification Defects in Fibroblast Growth Factor Receptor 1 as a Reason for Normosmic Isolated Hypogonadotropic Hypogonadism
Source: Oxid Med Cell Longev. 2020 Nov 21;2020:2358719. doi: 10.1155/2020/2358719 (PMC7704206; doi:10.1155/2020/2358719)

**Post-translational Modification** **Defects in Fibroblast Growth Factor Receptor 1 as a Reason for Normosmic Isolated** **Hypogonadotropic** **Hypogonadism**

**Hui Ying1,2,3,4,** **Yan Sun5,** **Huixiao Wu1,2,3,4, Wenyu Jia6,** **Qingbo Guan1,2,3,4,** **Zhao He3,4,** **Ling Gao1,2,4,7,** **Jiajun Zhao1,2,3,4,** **Yiming Ji1,2,3,4, Guimei Li5, Chao Xu 1,2,3,4***

1Department of Endocrinology and Metabolism, Shandong Provincial Hospital Affiliated to Shandong First Medical University, 324, Jing 5 Road, Jinan 250021, Shandong, China;

2 Department of Endocrinology and Metabolism, Shandong Provincial Hospital affiliated to Shandong University, Jinan, China;

3Institute of Endocrinology, Shandong Academy of Clinical Medicine, Jinan, China;

4 Shandong Provincial Key Laboratory of Endocrinology and Lipid Metabolism, Jinan, China;

5 Department of Pediatrics, Shandong Provincial Hospital Affiliated to Shandong First Medical University, Jinan, China

6Department of Endocrinology, Qingdao Municipal Hospital, Qingdao, China

7Scientific Center, Shandong Provincial Hospital affiliated to Shandong First Medical University, Jinan, China.

***Correspondence:**

Dr. Chao Xu, M.D., PhD.

E-mail: [doctorxuchao@163.com](mailto:doctorxuchao@163.com)

Tel: +86-53168776375

Fax: +86-531-87068707.

**Supplementary Materials**

**Supplementary Table 1.** Differential diagnosis between CHH and constitutional delay of growth and puberty.

| Differential points | CHH | CDGP |
| --- | --- | --- |
| Family history | Just a few (<30%) have a positive family of CDGP | a positive family history of CDGP more frequently (>63%) |
| Clinical features | CHH-associated phenotypes, like cryptorchidism (>30%) or Micropenis, congenital anosmia (i.e., unrelated to facial trauma, surgery, or chemical exposure), cleft defect, synkinesia, renal agenesis, etc. | Less than 2% have a history of cryptorchidism |
| Auxiliary examinations（before puberty） | TV <1ml;  INB <60pg/l;  LH<4.3 IU/L after GnRH-stimulated | TV ≥1.1ml;  INB≥60pg/l;  LH≥4.3 IU/L after GnRH-stimulated |
| Genetic testing | Mutations in at least one CHH gene were found in 51% of CHH probands, which is significantly higher than in CDGP (7%) or controls (18%). Similarly, oligogenicity (defined as mutations in more than one gene) was common in CHH patients (15%) relative to CDGP (1.4%) and controls (2%). | Most of them do not have CHH-related gene mutations (see the left) |
| Treatment | GnRH deficiency is permanent, hormonal treatment is always in need | CDGP is a state of transient GnRH deficiency where puberty eventually begins and is completed without hormonal treatment |

Abbreviations are as follows: CHH, congenital hypogonadotropic hypogonadism; Constitutional delay of growth and puberty, CDGP; Inhibin B, INB; Testicular volume, TV; FSH, Follicle-Stimulating Hormone; LH, luteinizing hormone.

**Supplementary Table 2.** The results of Gonadotropin-releasing hormone stimulation test on the proband.

| Time (min) | 0 | 30 | 60 |
| --- | --- | --- | --- |
| FSH (mIU/ml) | 0.96 | 10.56 | 11.22 |
| LH (mIU/ml) | 0.39 | 2.12 | 2.02 |

Abbreviations are as follows: FSH, Follicle-Stimulating Hormone; LH, luteinizing hormone.

**Supplementary Figure 1.** Mutation Taster as well as PolyPhen-2 predictions on the mutations of FGFR1 and CEP290.


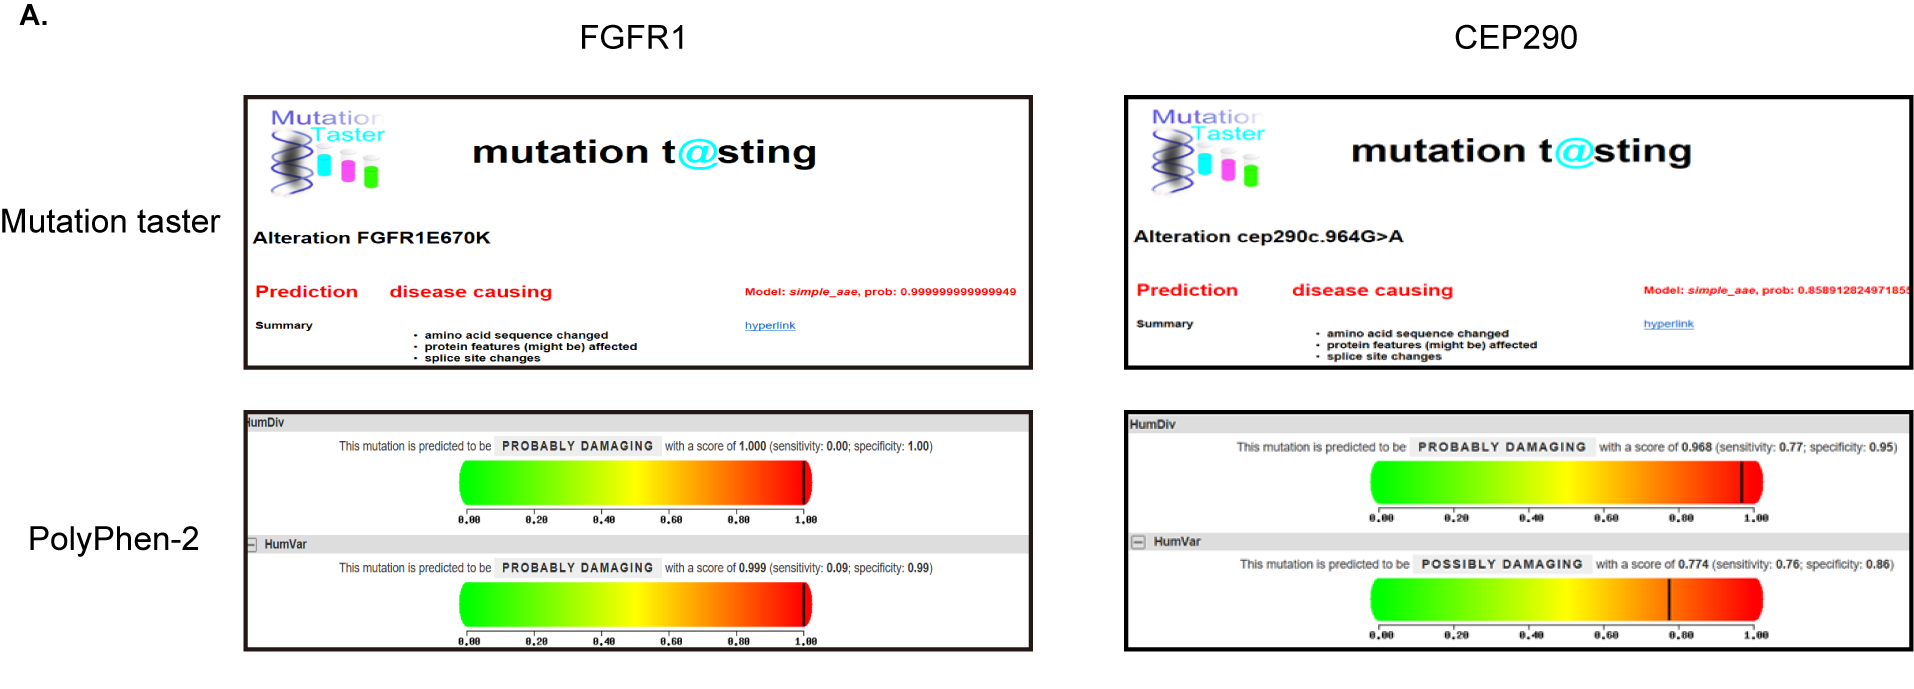


**Supplementary Figure 2.** Silico predictions of subcellular localization on the mutation of FGFR1 by WoLF PSORT.


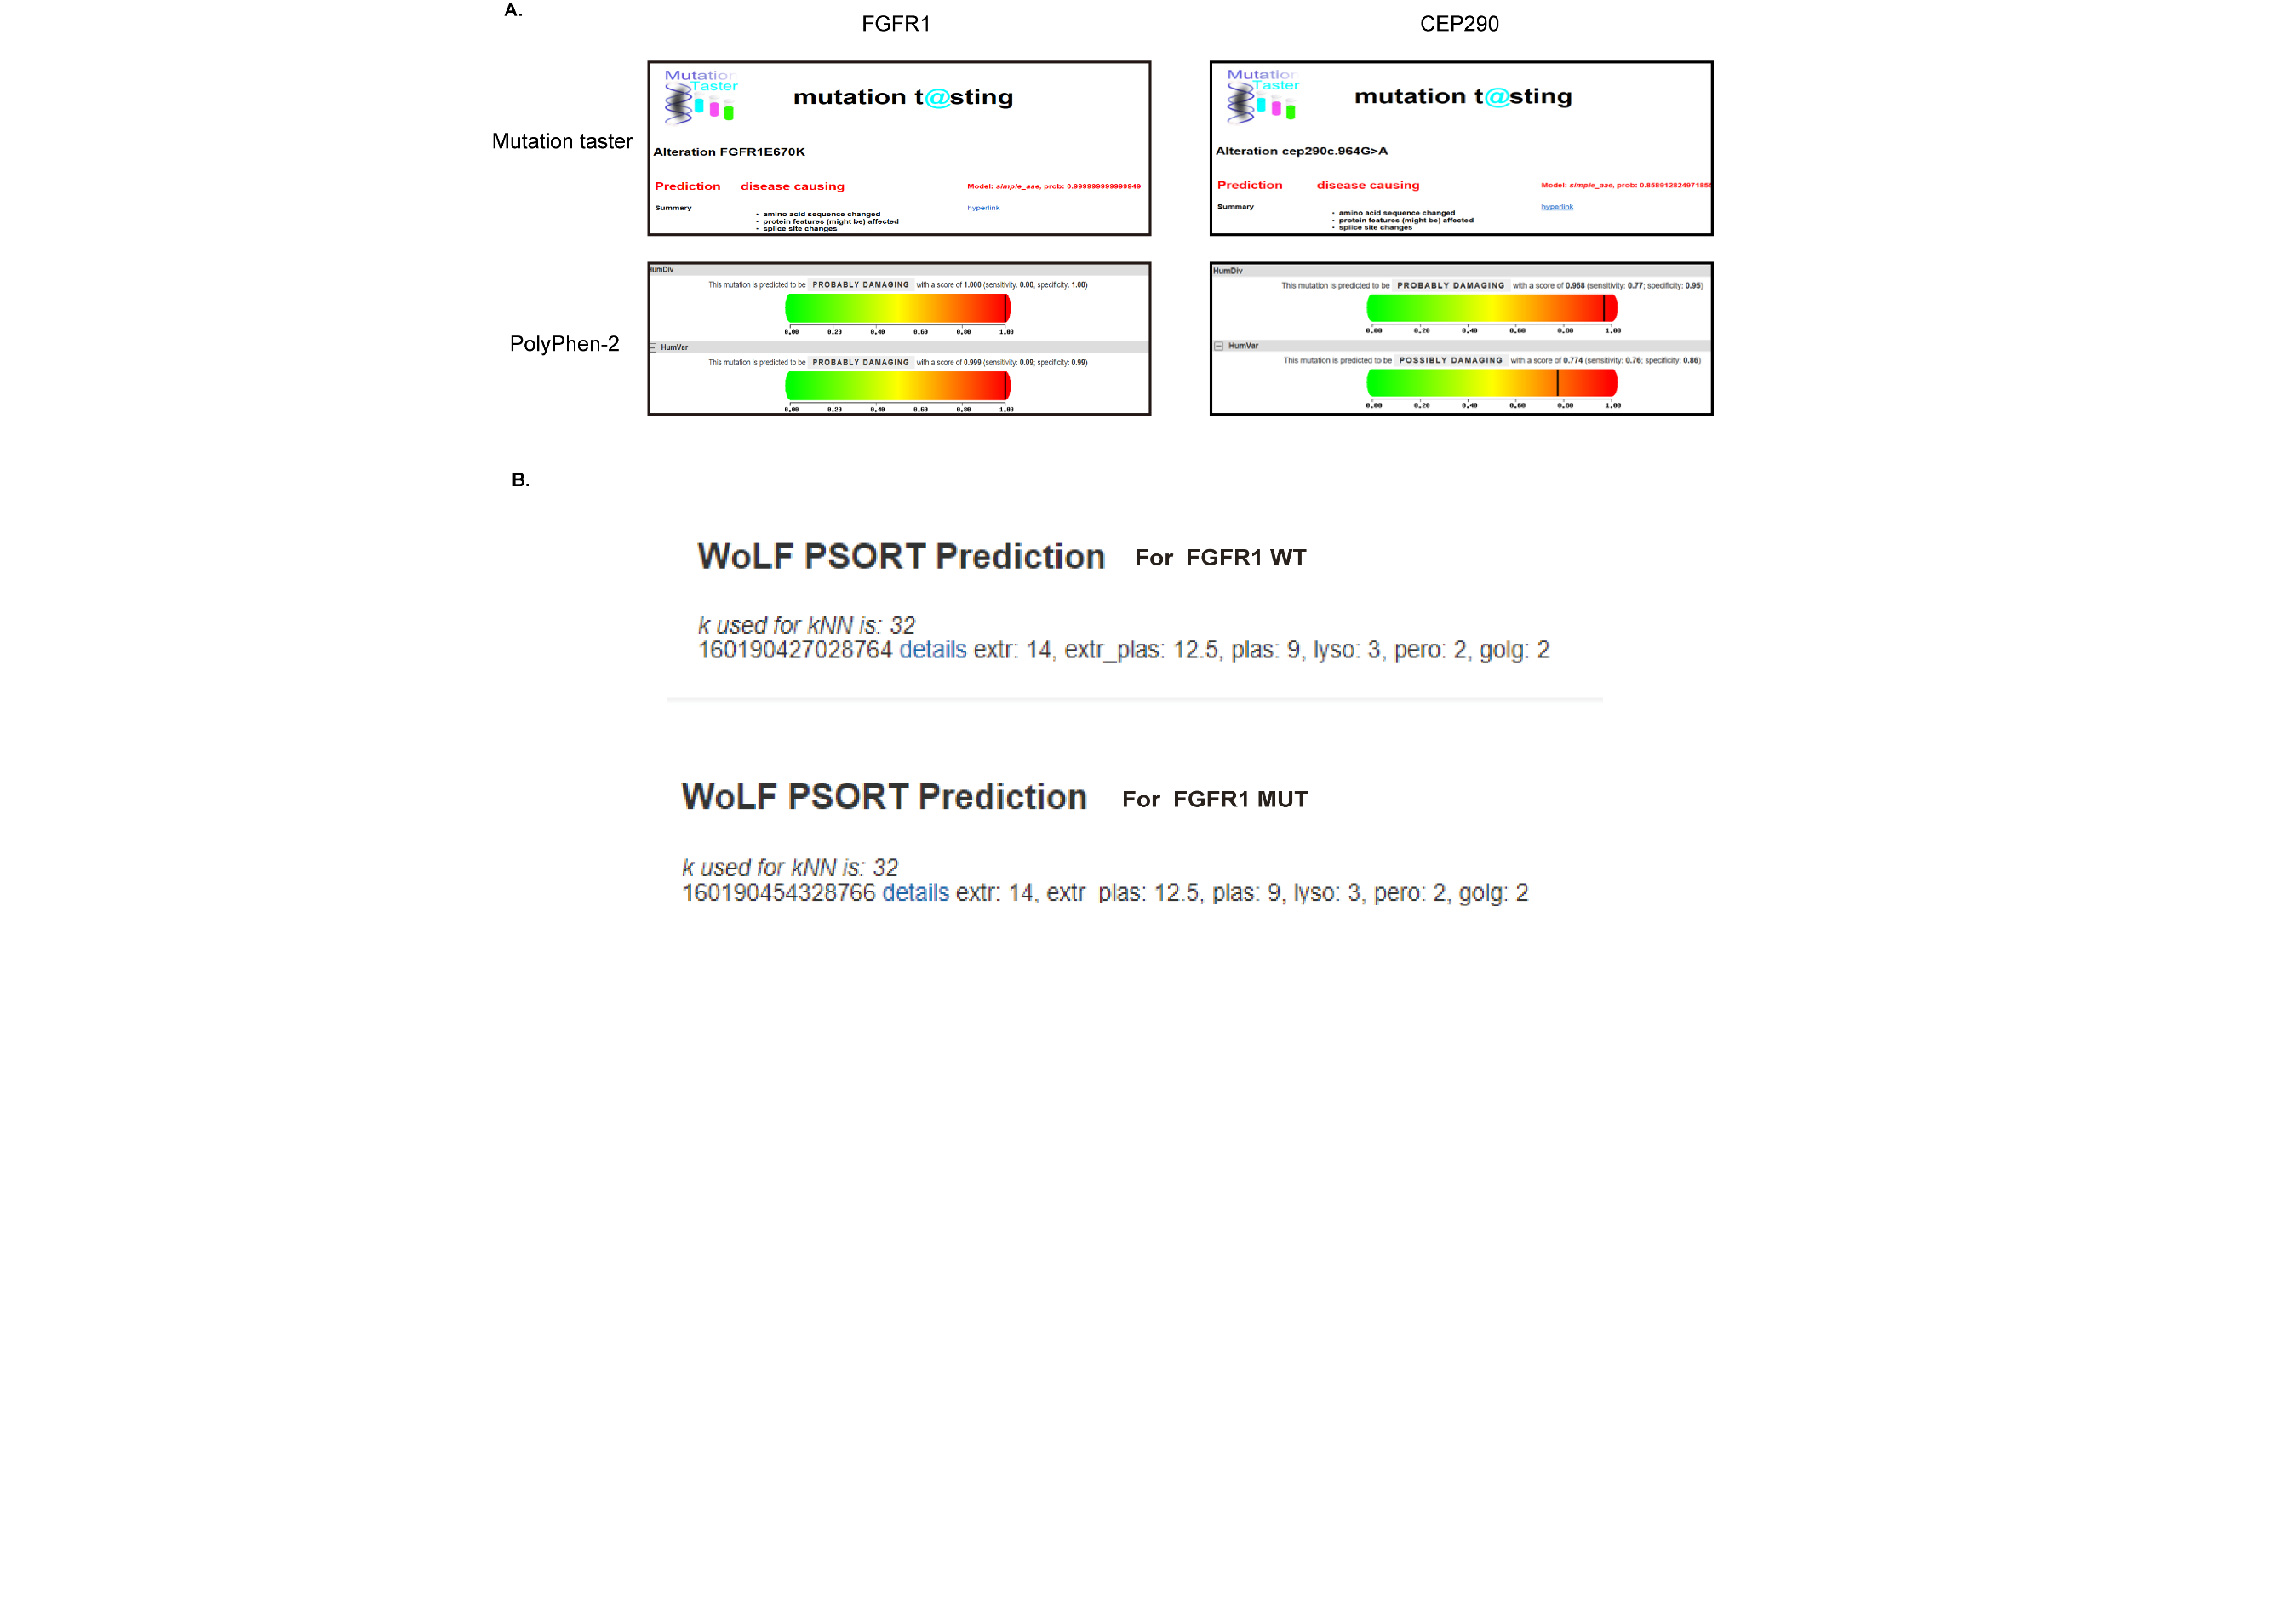

Supplement: Supplementary Materials — Supplementary Table 1: differential diagnosis between CHH and constitutional delay of growth and puberty. Supplementary Table 2: the results of a gonadotropin-releasing hormone stimulation test on the proband. Supplementary Figure 1: Mutation Taster as well as PolyPhen-2 predictions on the mutations of FGFR1 and CEP290. Supplementary Figure 2: silico predictions of subcellular localization on the mutation of FGFR1 by WoLF PSORT. [file 2358719.f1.doc]
